1     **Nanopore metagenomic sequencing of full length human metapneumovirus (HMPV)**  
2                                   **within a unique sub-lineage**

3  
4     Yifei Xu<sup>1,2\*</sup>, Kuiama Lewandowski<sup>3</sup>, Sheila Lumley<sup>4,5</sup>, Nicholas Sanderson<sup>1,2</sup>, Ali  
5     Vaughan<sup>1,2</sup>, Richard Vipond<sup>3</sup>, Miles Carroll<sup>3</sup>, Katie Jeffery<sup>5</sup>, Dona Foster<sup>1,2</sup>, A Sarah  
6     Walker<sup>1,2</sup>, Timothy Peto<sup>1,2</sup>, Derrick Crook<sup>1,2</sup>, Steven T Pullan<sup>3</sup>, Philippa C Matthews<sup>2,4,5</sup>

7  
8     <sup>1</sup> Nuffield Department of Medicine, University of Oxford, Oxford, United Kingdom, <sup>2</sup> NIHR  
9     Oxford Biomedical Research Centre, University of Oxford, United Kingdom, <sup>3</sup> Public Health  
10    England, National Infection Service, Porton Down, Salisbury, United Kingdom, <sup>4</sup> Nuffield  
11    Department of Medicine, Peter Medawar Building for Pathogen Research, University of  
12    Oxford, Oxford, United Kingdom, <sup>5</sup> Department of Infectious Diseases and Microbiology,  
13    Oxford University Hospitals NHS Foundation Trust, John Radcliffe Hospital, Oxford, United  
14    Kingdom

15    \*Address correspondence to Yifei Xu, [yifei.xu@ndm.ox.ac.uk](mailto:yifei.xu@ndm.ox.ac.uk).

16  
17    **Abstract**

18       Human metapneumovirus (HMPV) has been recognized as an important pathogen which  
19    can cause a spectrum of respiratory tract disease. Here, we report Nanopore metagenomic  
20    sequencing of the first full length HMPV genome directly from a throat swab from a UK  
21    patient with complex lung disease and immunocompromise. We found a predominance  
22    (26.4%) of HMPV reads in the metagenomic sequencing data and consequently assembled  
23    the full genome at a high depth of coverage (mean 4,786). Through phylogenetic analyses,  
24    we identified this HMPV strain to originate from a unique genetic group in A2b, showing the  
25    presence of this group in the UK. Our study demonstrated the effectiveness of Nanopore  
26    metagenomic sequencing for diagnosing infectious diseases and recovering complete

27 sequences for genomic characterization, highlighting the applicability of Nanopore  
28 sequencing in clinical settings.

29

### 30 **Importance**

31 Nanopore metagenomic sequencing has the potential to evolve as a point-of-care test for a  
32 range of infectious diseases. Here, we report the first full length human metapneumovirus  
33 (HMPV) genome in the UK sequenced by Nanopore from a non-invasive sample from an  
34 immunocompromised patient. We demonstrate the presence of HMPV from a unique genetic  
35 group not previously reported from the UK. Our study demonstrates the effectiveness of  
36 Nanopore sequencing for diagnosing an infection that was not detected by routine first-line  
37 tests in the clinical microbiology laboratory. We report sufficient genomic data to provide  
38 insight into the epidemiology of infection and with the potential to inform treatment  
39 decisions.

40

### 41 **Keywords**

42 Human metapneumovirus, HMPV, nanopore sequencing, metagenomics, throat swab, unique  
43 genetic group, respiratory tract infection, cystic fibrosis, lung transplant, microbiome

44

### 45 **Manuscript text**

46 Human metapneumovirus (HMPV) is a negative-sense, single-stranded RNA virus of  
47 approximately 13kb and belongs to the family Paramyxoviridae [1]. Since it was first  
48 described in 2001, HMPV has been recognized as an important pathogen which can cause  
49 respiratory tract diseases, ranging from mild upper respiratory tract infections to severe  
50 bronchiolitis and pneumonia [2]. HMPV can also cause severe disease in  
51 immunocompromised patients and those with underlying medical conditions, including lung

52 transplant recipients [3]. Two main genetic lineages (A and B) and five sublineages (A1, A2a,  
53 A2b, B1, and B2) have been described [4].

54 The Nanopore sequencing platform (Oxford Nanopore Technology, ONT) is capable of  
55 generating real-time sequencing data, with the potential to evolve as a point-of-care test for a  
56 range of infectious diseases [5,6]. In this report, we describe recovery of full length HMPV  
57 genome directly from a throat swab through the application of Nanopore metagenomic  
58 sequencing.

59 A male in his 40's with cystic fibrosis (CF) and a previous lung transplant presented with  
60 breathlessness, thick sputum and low oxygen saturations. His condition was further  
61 complicated by CF-related diabetes mellitus and bronchiolitis obliterans. To our knowledge,  
62 he had not travelled outside the UK. As he presented to hospital during the peak of the  
63 influenza season, a throat swab was taken to test for respiratory viruses in a clinical  
64 diagnostic laboratory; this sample was negative by PCR for influenza A, influenza B, and  
65 respiratory syncytial virus. Given his previous confirmed colonisation with *Pseudomonas*  
66 *aeruginosa*, he was treated with broad spectrum intravenous antibiotics, and discharged from  
67 hospital after two weeks.

68 We performed Nanopore metagenomic sequencing and generated 168,811 reads from this  
69 throat swab. We identified 44,580 (26.4%) HMPV reads and 5,393 (3.1%) human reads  
70 (which were discarded and not retained). The remaining reads mostly comprised bacteria  
71 representing oral flora (predominantly Lactobacilli (20%), Actinobacteria (7%), and  
72 Proteobacteria (6%)) (Fig. S1). Mapping results showed that HMPV reads covered 99.8%  
73 (13,291/13,319) of the reference sequence (USA/NM009/2016, accession number KY474539)  
74 at a high mean depth of coverage (4,786). The mean alignment length was 1,534bp and 25%  
75 of the alignments were longer than 2,000bp (Fig. 1). We used an alignment-based approach

76 to recover a HMPV genomic sequence of 12,893bp, referred to as JR001 (accession number  
77 xxx). The sequence is nearly complete excepting 205bp at the start of the coding region.

78 To determine the relationship between JR001 and previously published HMPV genomes,  
79 we constructed phylogenetic trees for the full length genome and eight genes (N, P, M, F, M2,  
80 SH, G, and L). JR001 clustered within genetic sublineage A2b on the basis of the full length  
81 genome and individual genes (Fig. 2 and Fig. S2). Seven HMPV strains from the United  
82 States and one strain from China were closely related to JR001, and formed a unique genetic  
83 group separated from other strains in A2b, strongly supported by a bootstrap value of 100.  
84 The pair-wise nucleotide sequence identities between JR001 and the eight related genomes  
85 ranges from 98.3% to 99.2%. This subgroup has been recently identified based on  
86 phylogenetic analysis of fusion and attachment genes [7], and comprises sequences  
87 originating from East and Southeast Asian countries, including Malaysia, Vietnam,  
88 Cambodia, China, and Japan, between 2006 and 2012 [7,8], and Croatia between 2011 and  
89 2014 [9]. Our study provided evidence supporting the presence of HMPV from this unique  
90 group in the UK. While we found JR001 shared high nucleotide sequence identities with  
91 HMPV strains from the US, its source remains unclear. Further studies are needed to  
92 investigate the geographical distribution of this unique genetic group of HMPV and its  
93 contribution to respiratory disease in the population.

94 We conducted time-scale phylogenetic analyses for the HMPV genome to estimate the  
95 time of emergence of this group. The topology of the time-scale phylogeny was consistent  
96 with that from the maximum-likelihood phylogenetic analyses. HMPV strains within the  
97 group were estimated to share a common ancestor originating in 2003 (95% highest posterior  
98 density [HPD], 1994 to 2008).

99 The extent to which the virus is a pathogen in this context is uncertain, as the patient was  
100 also at high risk of acute exacerbations of bacterial infection arising from *Pseudomonas*

101 colonisation. However, the recovery of the complete genome and the predominance of  
102 HMPV reads from the metagenome suggest active infection which could have been  
103 completely or partly responsible for the acute clinical deterioration. It is not uncommon to  
104 observe co-infection of HMPV with other respiratory viral pathogens, especially respiratory  
105 syncytial virus [10]; however we did not detect sequencing reads likely to represent other  
106 significant pathogens in this case (Fig. S1).

107 The case is the first full length HMPV genome in the UK sequenced by Nanopore  
108 technology directly from a non-invasive sample without the need for enrichment or viral  
109 isolation, diagnosing a potentially relevant pathogen that was not detected by routine first-  
110 line tests in the clinical microbiology laboratory, and producing data that can inform  
111 treatment as well as providing insights into the epidemiology of infection. Characterisation of  
112 the microbiome of patients with complex underlying lung disease, both during periods of  
113 clinical stability and in the setting of lower respiratory tract infections, could be valuable in  
114 informing intervention and supporting antimicrobial stewardship.

115

## 116 **Methods**

### 117 **Sample collection, preparation, and Nanopore sequencing**

118 A throat swab was collected in viral transport media from a patient presenting to our  
119 tertiary referral teaching hospital in Oxford, United Kingdom. The sample was tested for  
120 respiratory viruses using Xpert Xpress Flu/RSV assay (Cepheid, Sunnyvale, CA, USA) in a  
121 clinical diagnostic laboratory. The sample was frozen for retrospective Nanopore sequencing.  
122 The sample was thawed and passed through a 0.45 µm filter prior to RNA extraction and  
123 DNase treatment. cDNA was prepared and amplified using a Sequence-Independent-Single-  
124 Primer-Amplification method as described previously [11]. cDNA was used as input for a

125 SQK-LS108 library preparation and sequencing on a R9.4.1 flow cell using a MinION device  
126 (ONT).

## 127 **Genomic analysis**

128 Nanopore reads were basecalled using Albacore v2.1.7 (ONT). Metagenomic  
129 classification and mapping were used to identify HMPV reads. Reads were first  
130 taxonomically classified against RefSeq database using Centrifuge v1.0.3 [12]. *De novo*  
131 assembly was then performed with HMPV-like reads using Canu v1.7 [13]. The resulting  
132 contigs were BLASTed against GenBank nt database to determine the reference HMPV  
133 sequence. Reads were mapped against the selected reference (USA/NM009/2016, accession  
134 number KY474539) using Minimap2 [14]. HMPV reads were defined as those assigned to  
135 HMPV by centrifuge and confirmed by mapping. Consensus sequence for the HMPV strain  
136 was built using Nanopolish v0.9.2 [15].

137 Phylogenetic analyses were conducted using an integrated dataset that comprised the  
138 HMPV sequence from this study and 154 complete HMPV genomic sequences from NIAID  
139 Virus Pathogen Database and Analysis Resource (ViPR) and NCBI Genbank [16].  
140 Maximum-likelihood phylogenies were generated using RAxML v8.2.10 [17]. Time scale  
141 phylogenies were built for genomic sequences with complete sampling dates (month, day,  
142 and year) using BEAST v1.10.1 [18]. The SRD06 partitioned substitution model,  
143 uncorrelated lognormal relaxed clock model, and Bayesian skyline coalescent tree prior were  
144 used in the analyses. Multiple independent runs were performed with a chain length of 200  
145 million steps and sampled every 10,000 steps. These runs were combined to ensure an  
146 adequate effective sample size (>200) for relevant parameters.

147

## 148 **Ethics statement**

149 This sample that was surplus to diagnostic requirements was sequenced as part of a larger  
150 study with Research Ethics Committee approval (17/LO/1420).

151

## 152 **Accession number**

153 The sequencing data was deposited in the xxx under accession no. xxx.

154

## 155 **Funding**

156 This work was supported by NIHR Oxford Biomedical Research Centre.

157

## 158 **References**

- 159 1. Kahn JS. Epidemiology of human metapneumovirus. *Clin Microbiol Rev. Am Soc*  
160 *Microbiol*; 2006;19:546–57.
- 161 2. Van den Hoogen BG, de Jong JC, Groen J, Kuiken T, de Groot R, Fouchier RAM, et al. A  
162 newly discovered human pneumovirus isolated from young children with respiratory tract  
163 disease. *Nat Med. Nature Publishing Group*; 2001;7:719.
- 164 3. Hopkins P, McNeil K, Kermeen F, Musk M, McQueen E, Mackay I, et al. Human  
165 metapneumovirus in lung transplant recipients and comparison to respiratory syncytial virus.  
166 *Am J Respir Crit Care Med. American Thoracic Society*; 2008;178:876–81.
- 167 4. Kim J Il, Park S, Lee I, Park KS, Kwak EJ, Moon KM, et al. Genome-wide analysis of  
168 human metapneumovirus evolution. *PLoS One. Public Library of Science*; 2016;11:e0152962.
- 169 5. Quick J, Loman NJ, Duraffour S, Simpson JT, Severi E, Cowley L, et al. Real-time,  
170 portable genome sequencing for Ebola surveillance. *Nature. Nature Publishing Group*;  
171 2016;530:228.
- 172 6. Greninger AL, Naccache SN, Federman S, Yu G, Mbala P, Bres V, et al. Rapid  
173 metagenomic identification of viral pathogens in clinical samples by real-time nanopore  
174 sequencing analysis. *Genome Med. BioMed Central*; 2015;7:99.
- 175 7. Chow WZ, Chan YF, Oong XY, Ng LJ, Nor'E SS, Ng KT, et al. Genetic diversity,  
176 seasonality and transmission network of human metapneumovirus: identification of a unique  
177 sub-lineage of the fusion and attachment genes. *Sci Rep. Nature Publishing Group*;  
178 2016;6:27730.
- 179 8. Nidaira M, Taira K, Hamabata H, Kawaki T, Gushi K, Mahoe Y, et al. Molecular  
180 epidemiology of human metapneumovirus from 2009 to 2011 in Okinawa, Japan. *Jpn J Infect*  
181 *Dis. National Institute of Infectious Diseases, Japanese Journal of Infectious Diseases*  
182 *Editorial Committee*; 2012;65:337–40.
- 183 9. Jagušić M, Slović A, Ljubin-Sternak S, Mlinarić-Galinović G, Forčić D. Genetic diversity

- 184 of human metapneumovirus in hospitalized children with acute respiratory infections in  
185 Croatia. *J Med Virol*. Wiley Online Library; 2017;89:1885–93.
- 186 10. Paranhos-Baccalà G, Komurian-Pradel F, Richard N, Vernet G, Lina B, Floret D. Mixed  
187 respiratory virus infections. *J Clin Virol*. Elsevier; 2008;43:407–10.
- 188 11. Kafetzopoulou LE, Efthymiadis K, Lewandowski K, Crook A, Carter D, Osborne J, et al.  
189 Assessment of Metagenomic MinION and Illumina sequencing as an approach for the  
190 recovery of whole genome sequences of chikungunya and dengue viruses directly from  
191 clinical samples. *bioRxiv*. Cold Spring Harbor Laboratory; 2018;355560.
- 192 12. Kim D, Song L, Breitwieser FP, Salzberg SL. Centrifuge: rapid and sensitive  
193 classification of metagenomic sequences. *Genome Res*. Cold Spring Harbor Lab; 2016;
- 194 13. Koren S, Walenz BP, Berlin K, Miller JR, Bergman NH, Phillippy AM. Canu: scalable  
195 and accurate long-read assembly via adaptive k-mer weighting and repeat separation.  
196 *Genome Res*. Cold Spring Harbor Lab; 2017;27:722–36.
- 197 14. Li H. Minimap2: pairwise alignment for nucleotide sequences. *Bioinformatics*. Oxford  
198 University Press; 2018;1:7.
- 199 15. Loman NJ, Quick J, Simpson JT. A complete bacterial genome assembled de novo using  
200 only nanopore sequencing data. *Nat Methods*. Nature Publishing Group; 2015;12:733.
- 201 16. Pickett BE, Sadat EL, Zhang Y, Noronha JM, Squires RB, Hunt V, et al. ViPR: an open  
202 bioinformatics database and analysis resource for virology research. *Nucleic Acids Res*.  
203 Oxford University Press; 2011;40:D593–8.
- 204 17. Stamatakis A. RAxML version 8: a tool for phylogenetic analysis and post-analysis of  
205 large phylogenies. *Bioinformatics*. Oxford University Press; 2014;30:1312–3.
- 206 18. Suchard MA, Lemey P, Baele G, Ayres DL, Drummond AJ, Rambaut A. Bayesian  
207 phylogenetic and phylodynamic data integration using BEAST 1.10. *Virus Evol*. Oxford  
208 University Press; 2018;4:vey016.
- 209



210 **Figure legend**

211 **Figure 1.** Results of Nanopore sequencing of an HMPV isolate from a throat swab. (A)  
212 Histogram of alignment length derived by mapping Nanopore reads to HMPV reference  
213 sequence (USA/NM009/2016, accession number KY474539). The mean alignment length is  
214 1,534bp and 25% of the alignment are longer than 2,000bp. (B) Plot of depth of coverage.  
215 HMPV reads cover the full reference genome (99.8%) at a high depth of coverage (mean  
216 4,786). Five HMPV reads, indicated by red lines, are nearly able to cover the full reference  
217 genome.

218  
219 **Figure 2.** Maximum-likelihood (ML) phylogenetic trees of HMPV isolates from this study  
220 and public databases. (A) ML tree for the full HMPV genome, (B) ML tree for G gene, (C)  
221 ML tree for F gene. Five known genetic sublineages, A1, A2a, A2b, B1, and B2, are  
222 indicated by blue boxes and grey triangles. Numbers at the nodes indicate bootstrap support  
223 evaluated by 1,000 replicates. The complete phylogenies, showing name of all strains  
224 included in the analyses, are shown in supplementary Fig. S2. HMPV strain from this study  
225 and eight strains from US and China formed a unique group within A2, indicated by a red  
226 box.

227

228 **Supplemental materials**

229 **Figure S1.** Taxonomic assignment of Nanopore sequencing reads of a throat swab from a  
230 patient with complex lung disease and immunocompromise. HMPV reads accounted for 26%  
231 of the total reads.

232

233 **Figure S2.** Maximum-likelihood (ML) phylogenetic trees for the full length genome and  
234 gene of HMPV isolates from this study and public databases. Numbers at the nodes indicate  
235 bootstrap support evaluated by 1,000 replicates. Five known genetic sublineages, A1, A2a,  
236 A2b, B1, and B2, are indicated by blue and grey boxes. HMPV strain from this study and  
237 eight strains from US and China formed a unique group within A2, indicated by a red box.

Figure 1

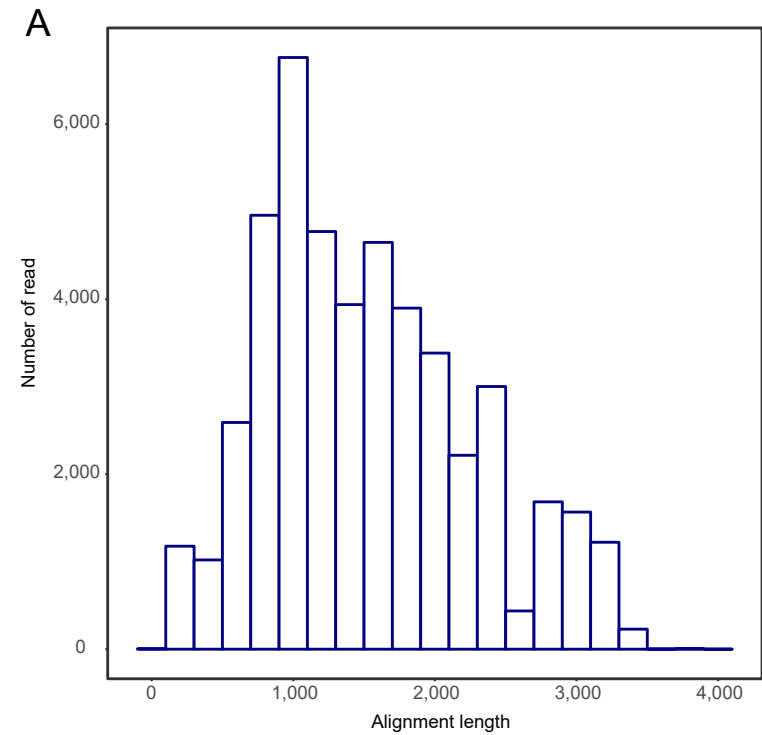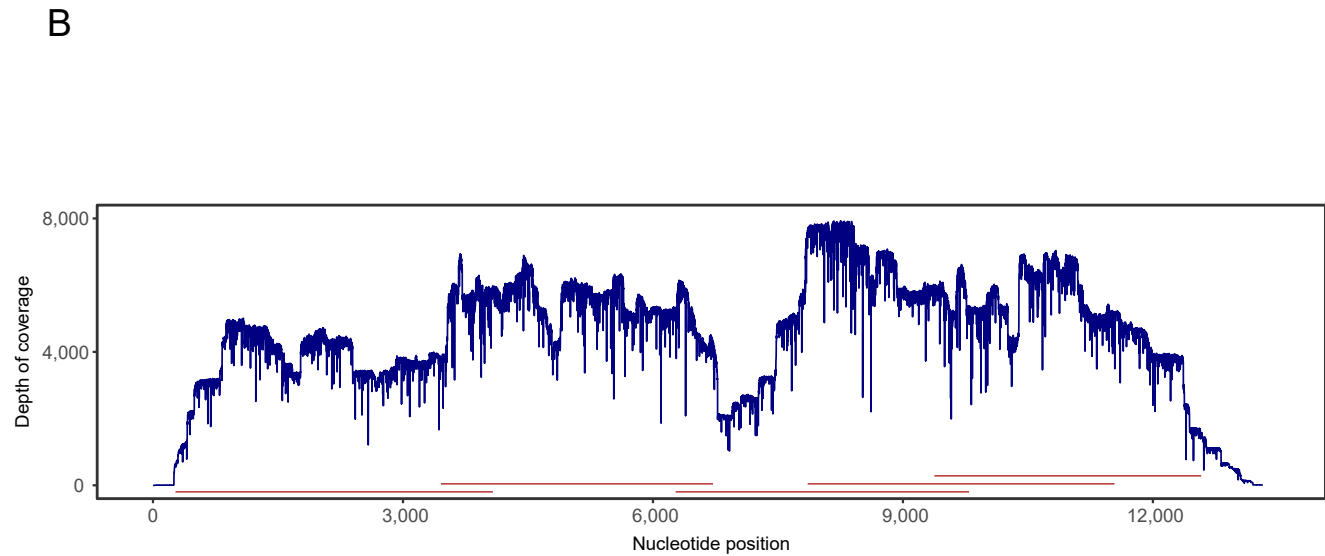

Figure 2

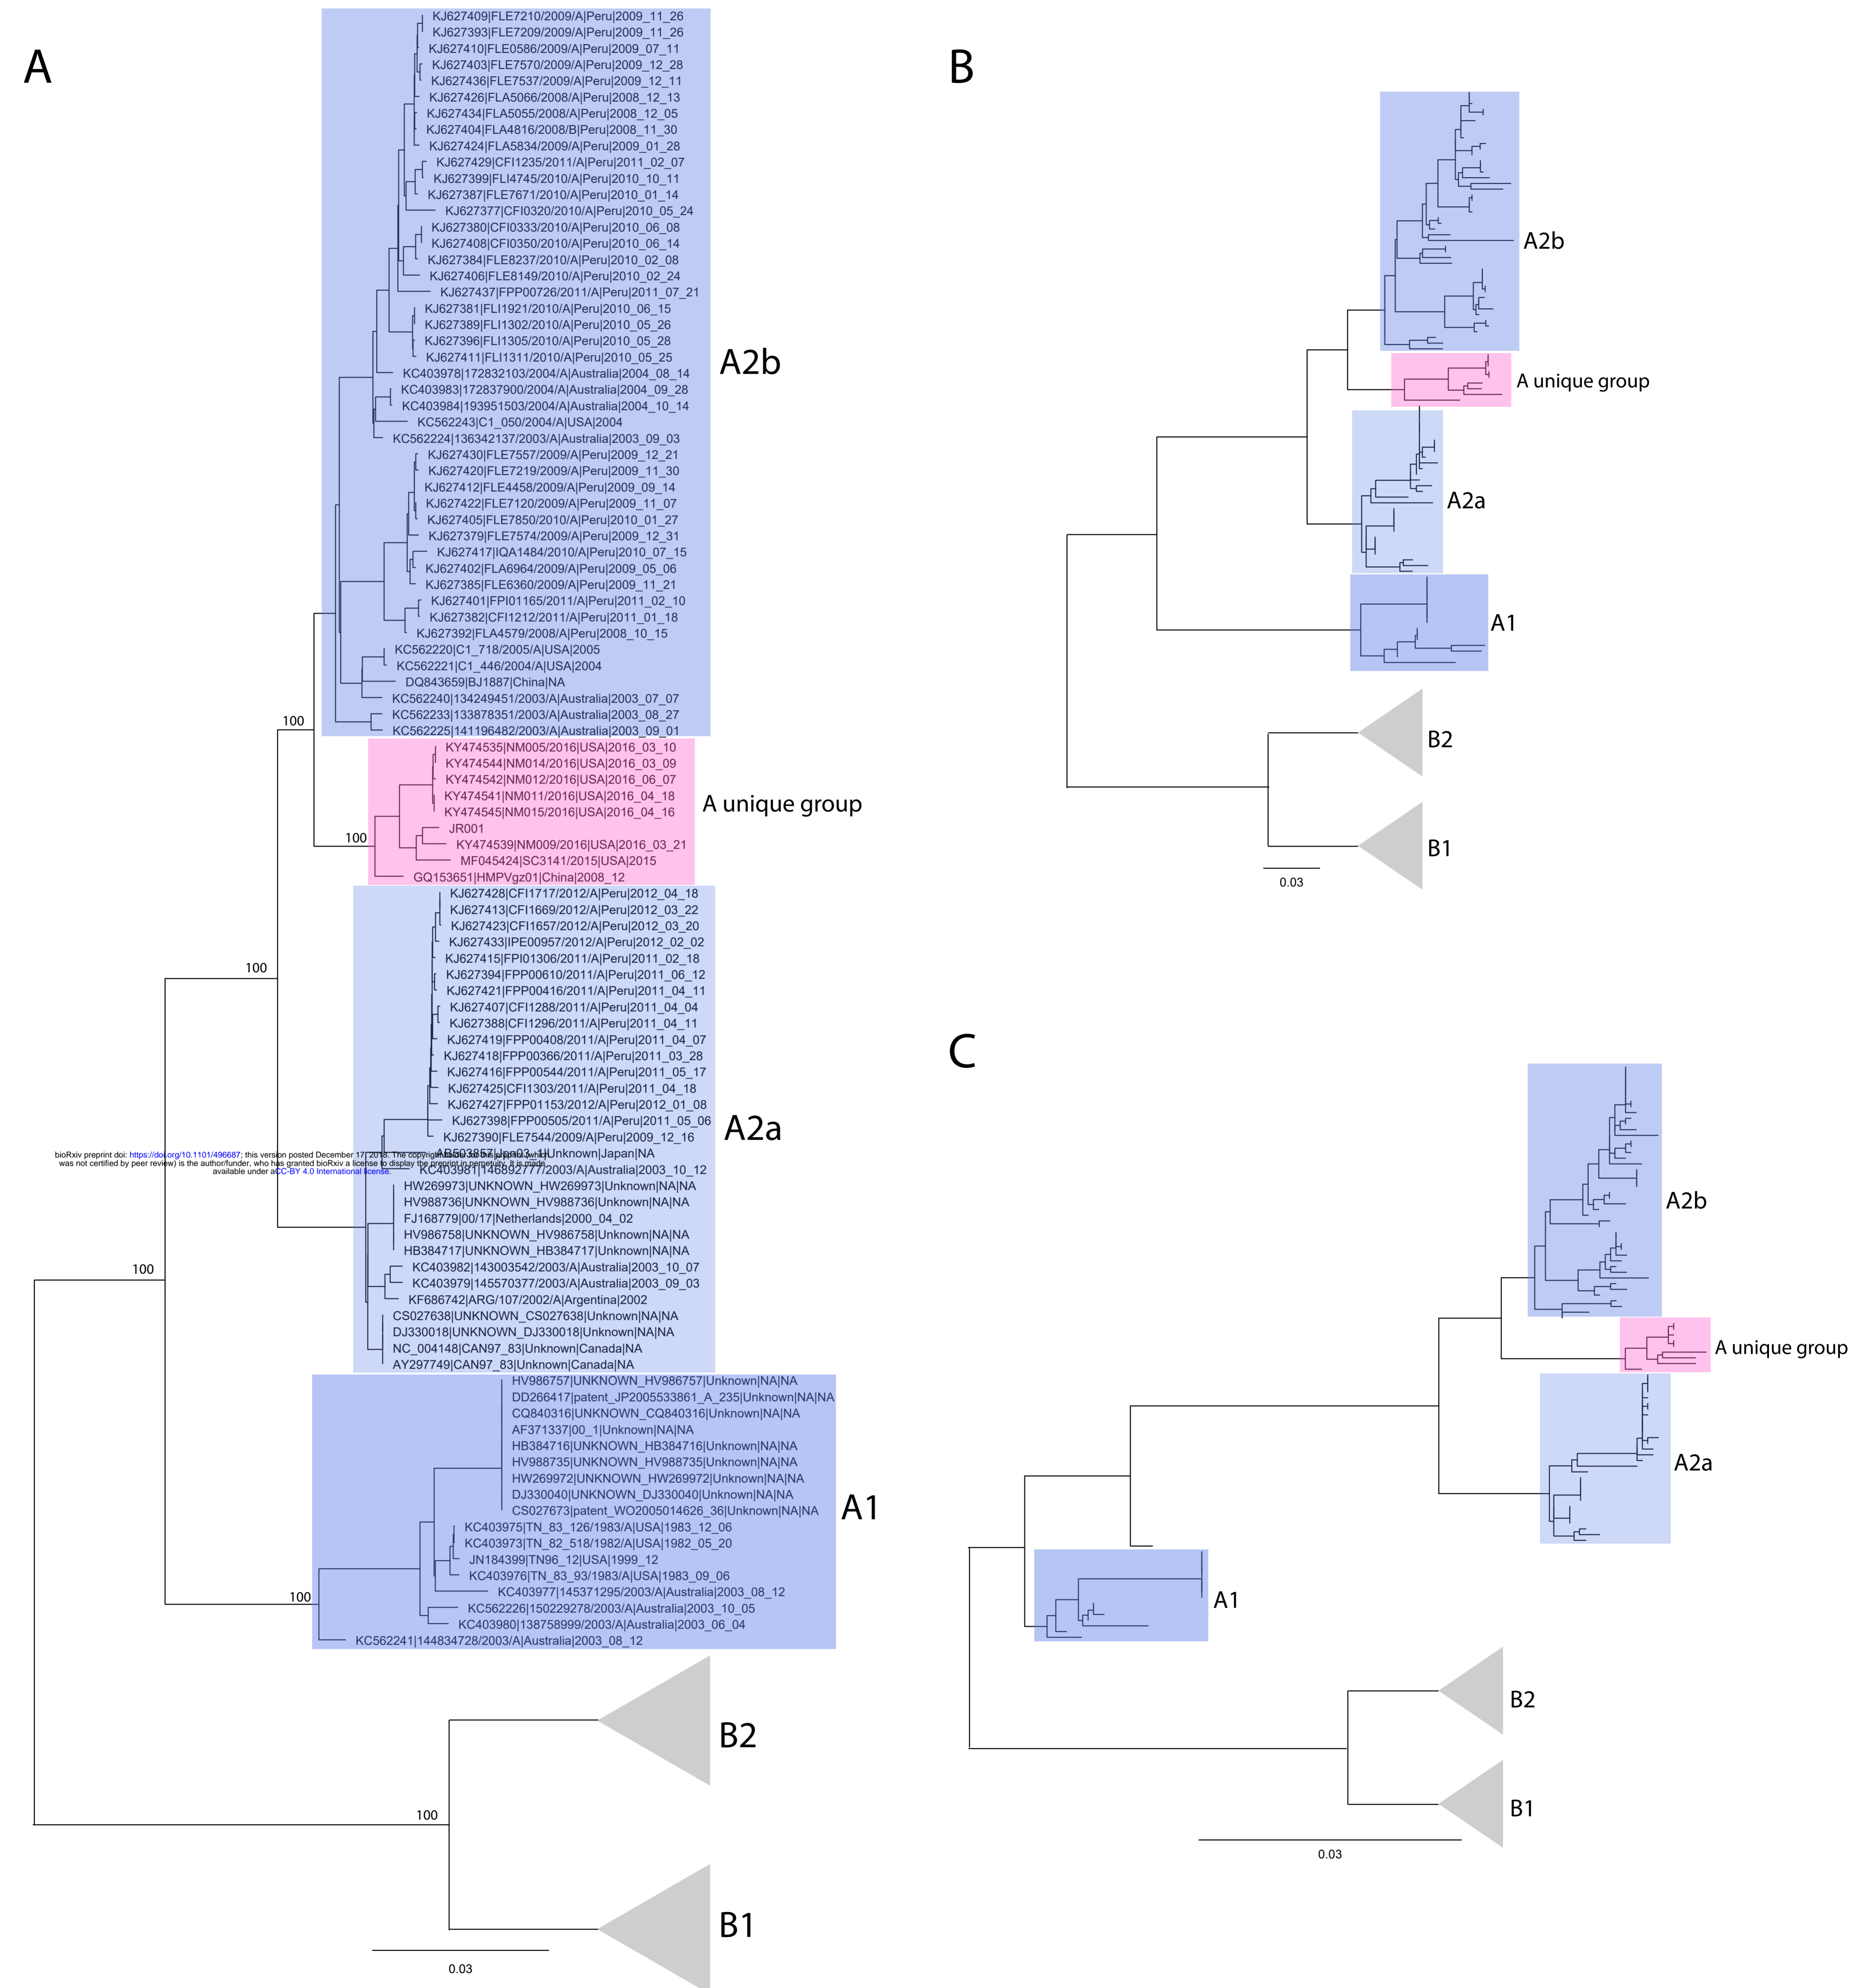

Source: https://www.biorxiv.org/content/10.1101/496687v1.full.pdf
